# Supplementary material
Source: Springer Nature journal article supplement (https://www.springermedizin.de/resource/supplementary/13063_2011_762_MOESM1_ESM.pdf/9618672)
Supplement: MOESM1 [file 9618672]

# FORA TeleHealth System

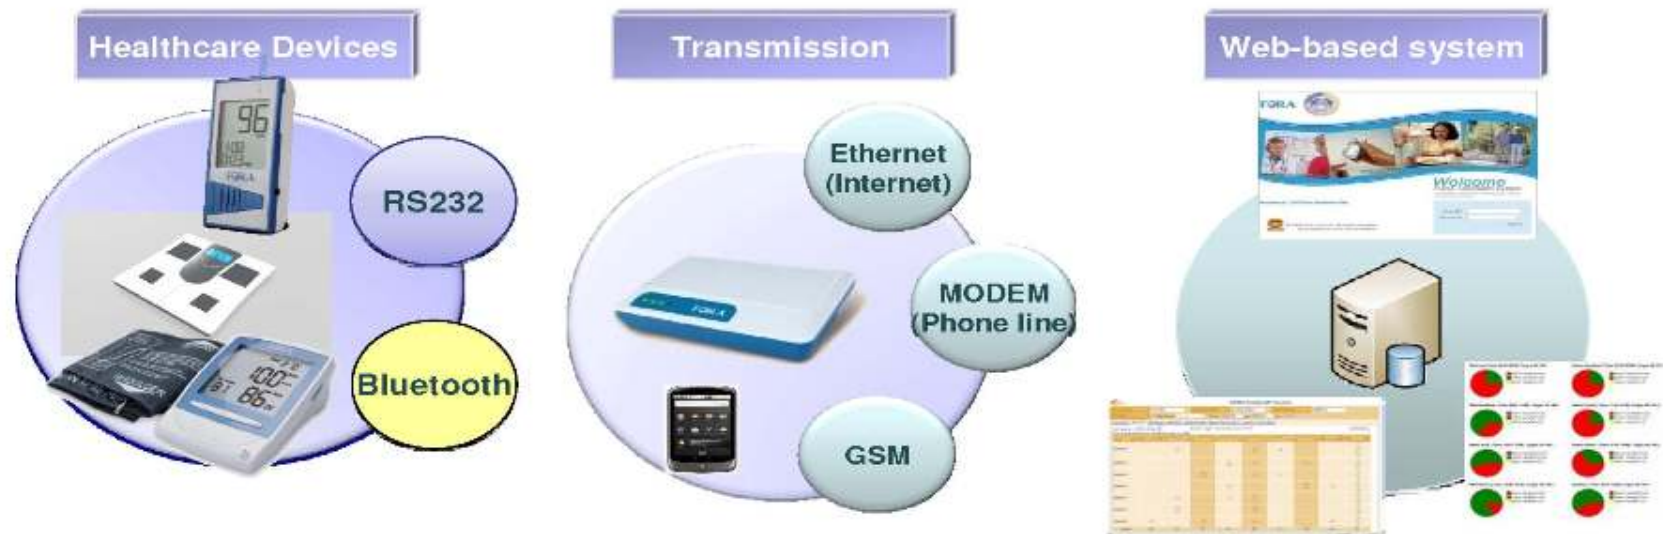

## Total solution includes:

1. Innovation devices
2. Flexible transmission pathways
3. Centralized data service
